# Supplementary material for: Population genomics of Acacia senegal (L.) Willd: adaptive variation in its natural range in Niger
Source: Research Square preprint supplement (doi:10.21203/rs.3.rs-8339114/v1), 2026-01-13
Supplement: Supplementary file 1 [file 05318b2f86685a98aa433745.docx]

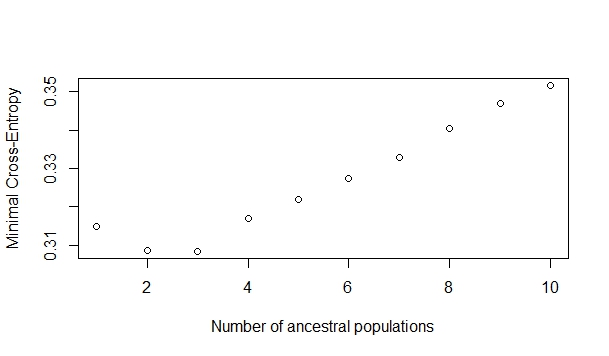


**Figure S1**: Cross-entropy criterion for SNMF runs (K = 1–10), showing minimal cross-entropy at K = 3, supporting three ancestral clusters.


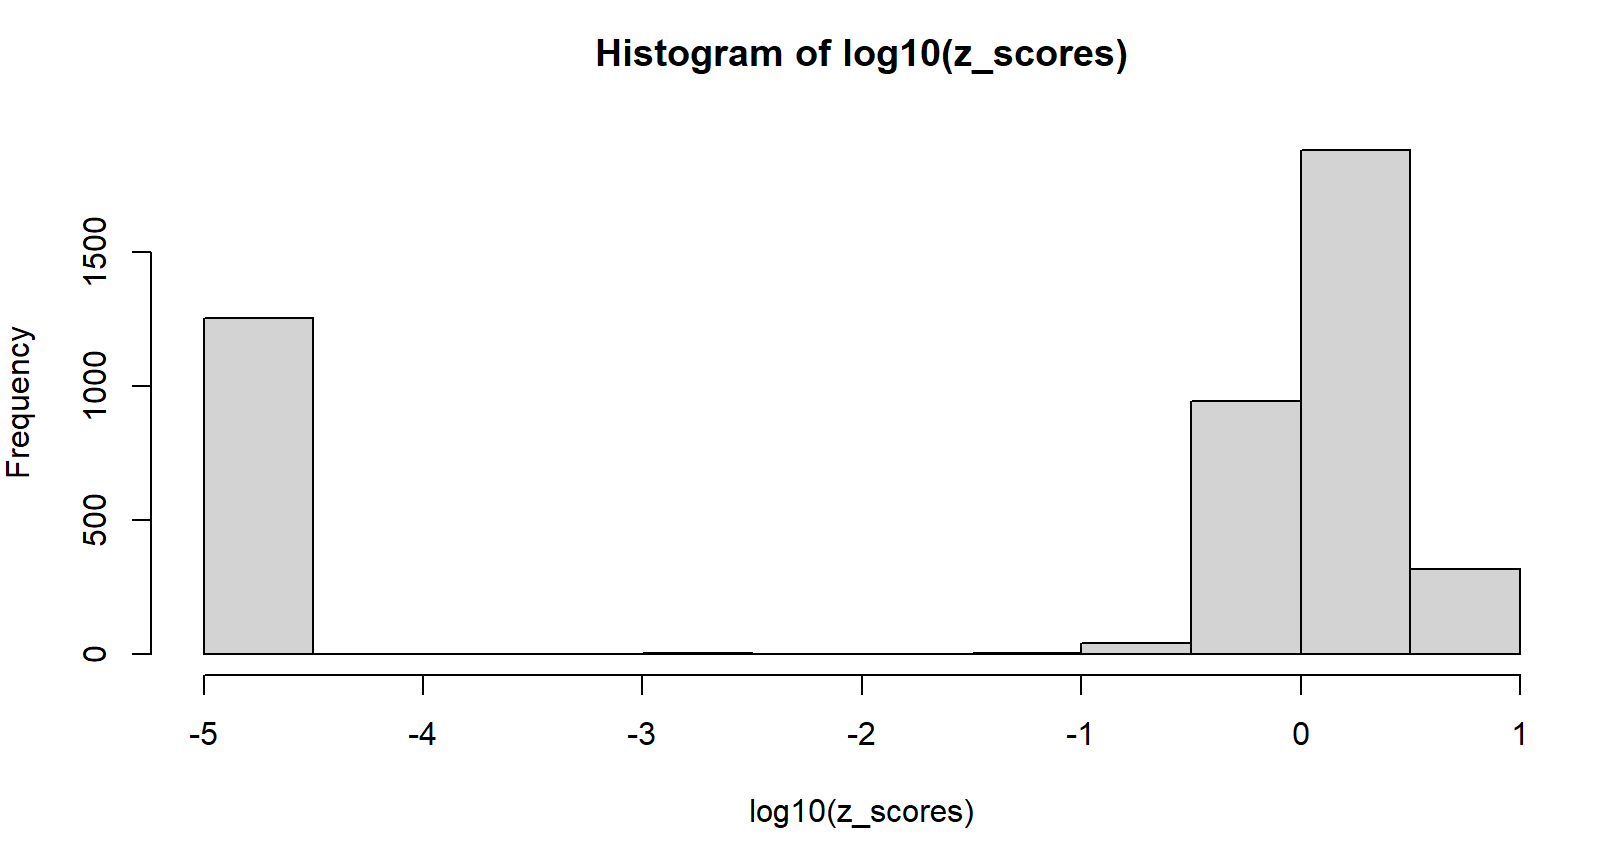


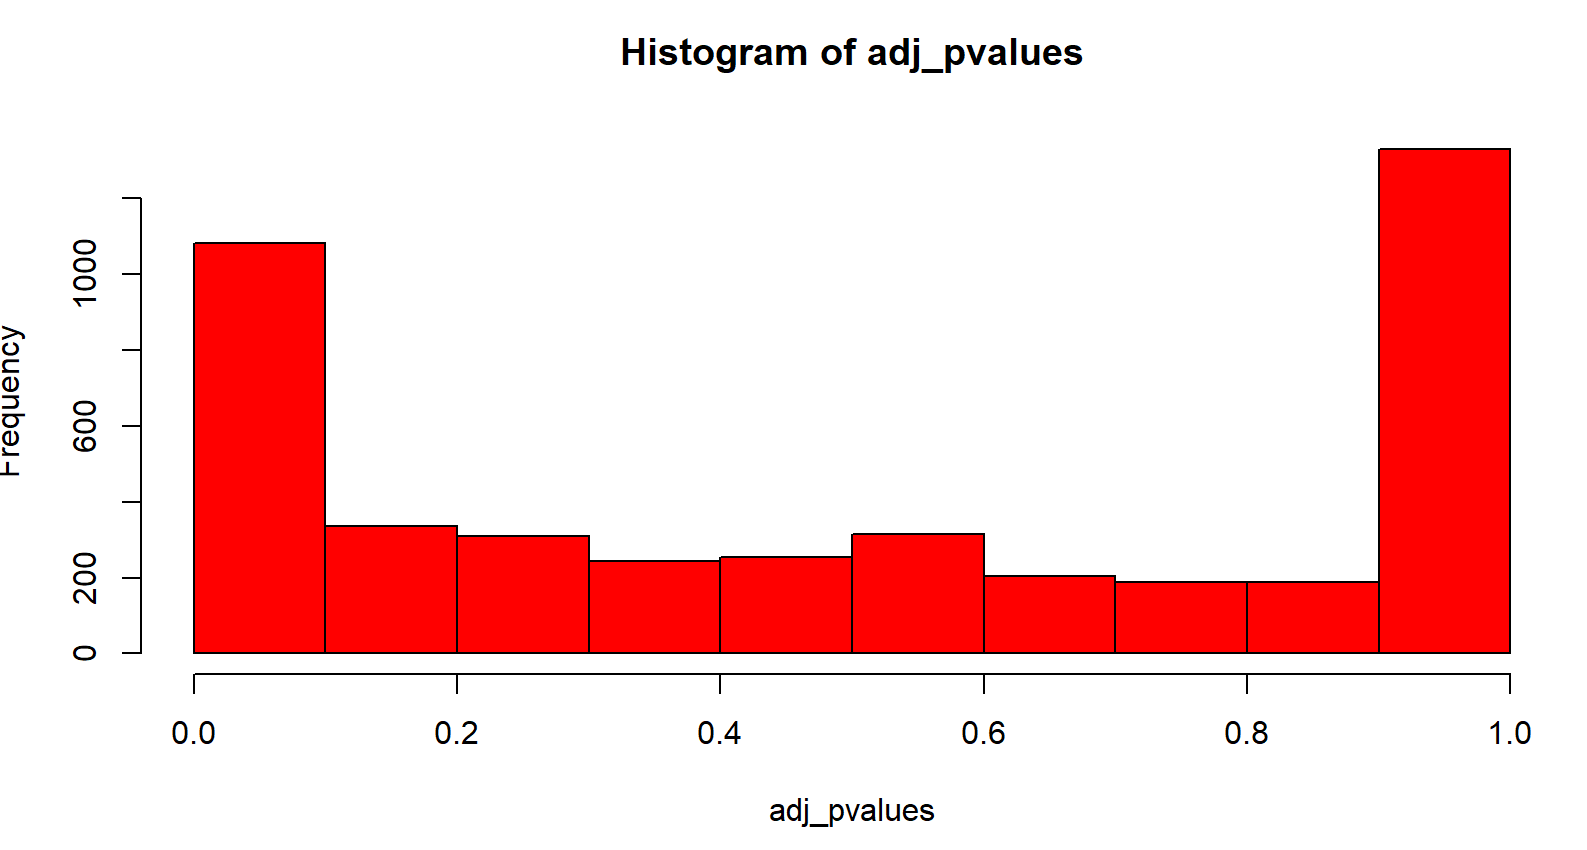


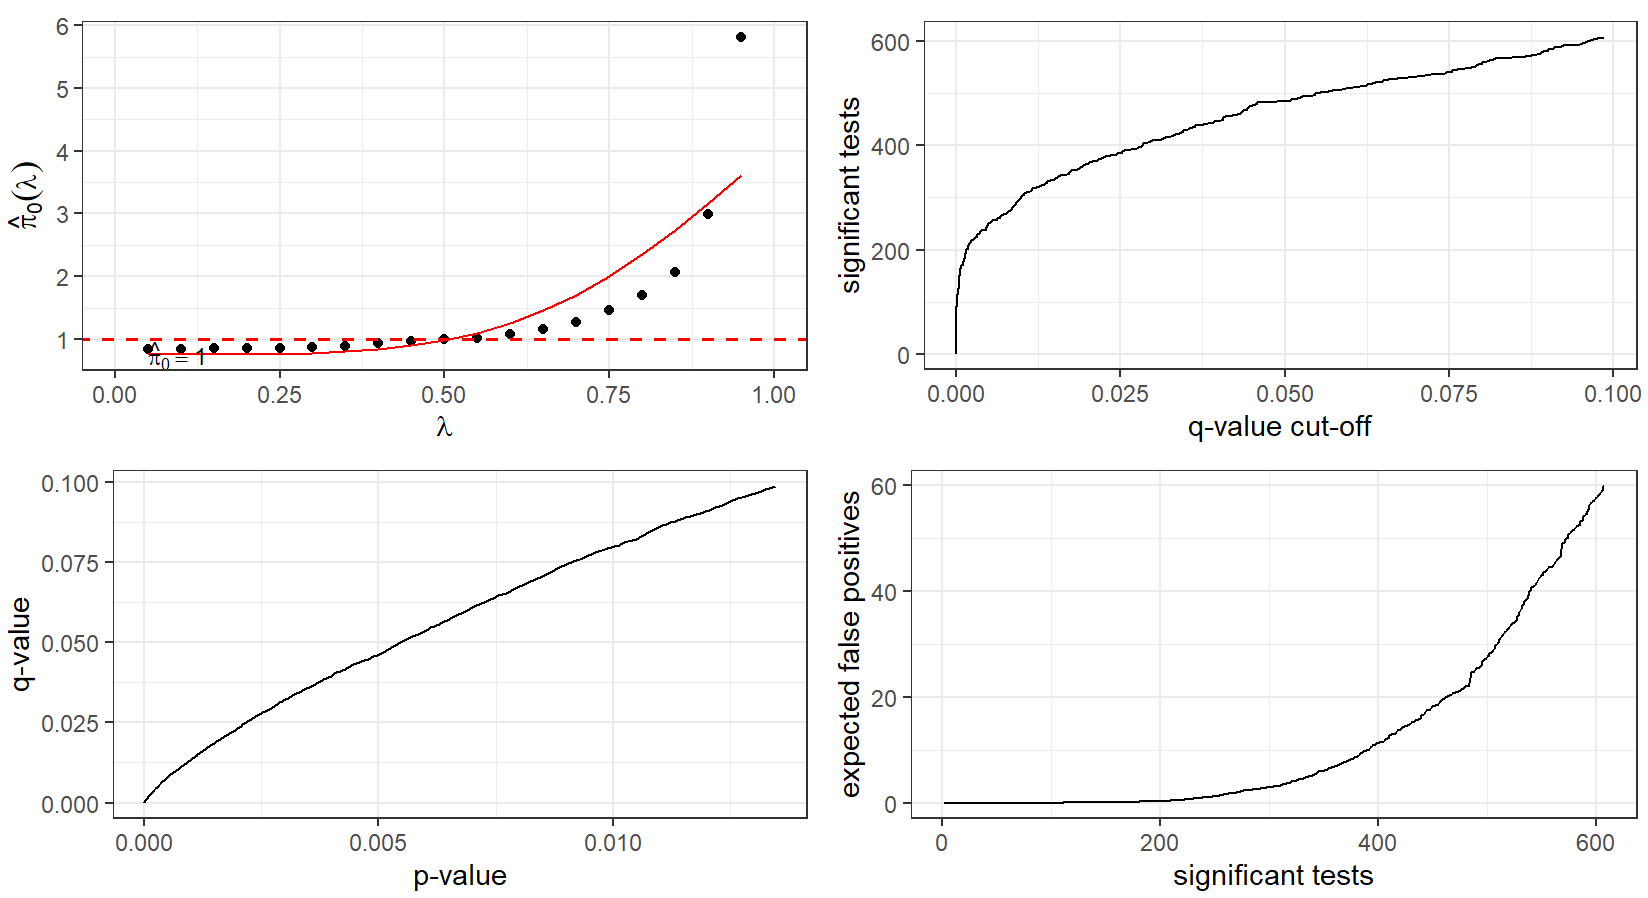


**Figure S2**: statistics to detect candidate SNPs
